# Supplementary material
Source: Royal Society of Chemistry journal article supplement (doi:10.1039/d6cp01072e)
Supplement: d6cp01072e1.pdf [file d6cp01072e1.pdf]

## Supplementary Information

### Phase behaviour of liquid CO<sub>2</sub> with an impurity of water: Influence of CO<sub>2</sub> hydrate.

Hideki Tanaka\*<sup>1,2</sup>, Masakazu Matsumoto<sup>1</sup>, Takuma Yagasaki<sup>3</sup>,  
Munetaka Takeuchi<sup>2</sup>, Yoshihito Mori<sup>4</sup>, and Takumi Kono<sup>2</sup>

<sup>1</sup> Research Institute for Interdisciplinary Science, Okayama University, Okayama 700-8530 Japan

<sup>2</sup> Engineering Advancement Association of Japan, 1-11-9 Azabudai, Minato-ku, Tokyo 105-0001, Japan

<sup>3</sup> Division of Chemical Engineering, Graduate School of Engineering Science, Osaka University, Osaka 560-8531 Japan

<sup>4</sup> Ochanomizu University, 2-1-1 Ohtsuka, Bunkyo-ku, Tokyo 112-8610, Japan

\*) e-mail address: htanakaa@okayama-u.ac.jp

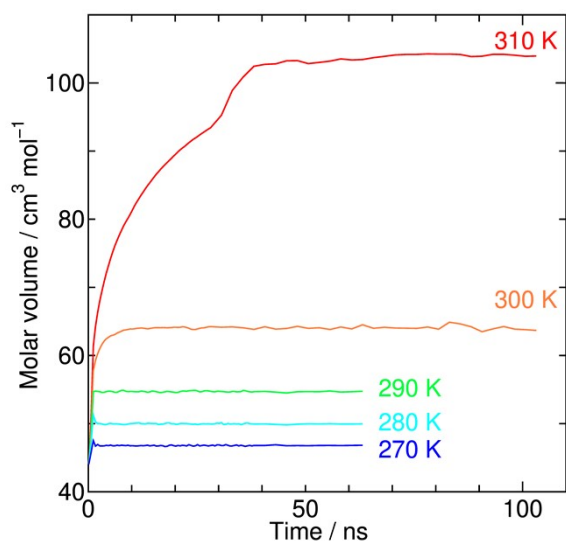

Fig. S1 Time evolution of the molar volume of liquid CO<sub>2</sub> averaged every 1 ns at a pressure of 10 MPa and at temperatures of (blue) 270, (cyan) 280, (green) 290, (orange) 300, and (red) 310 K.

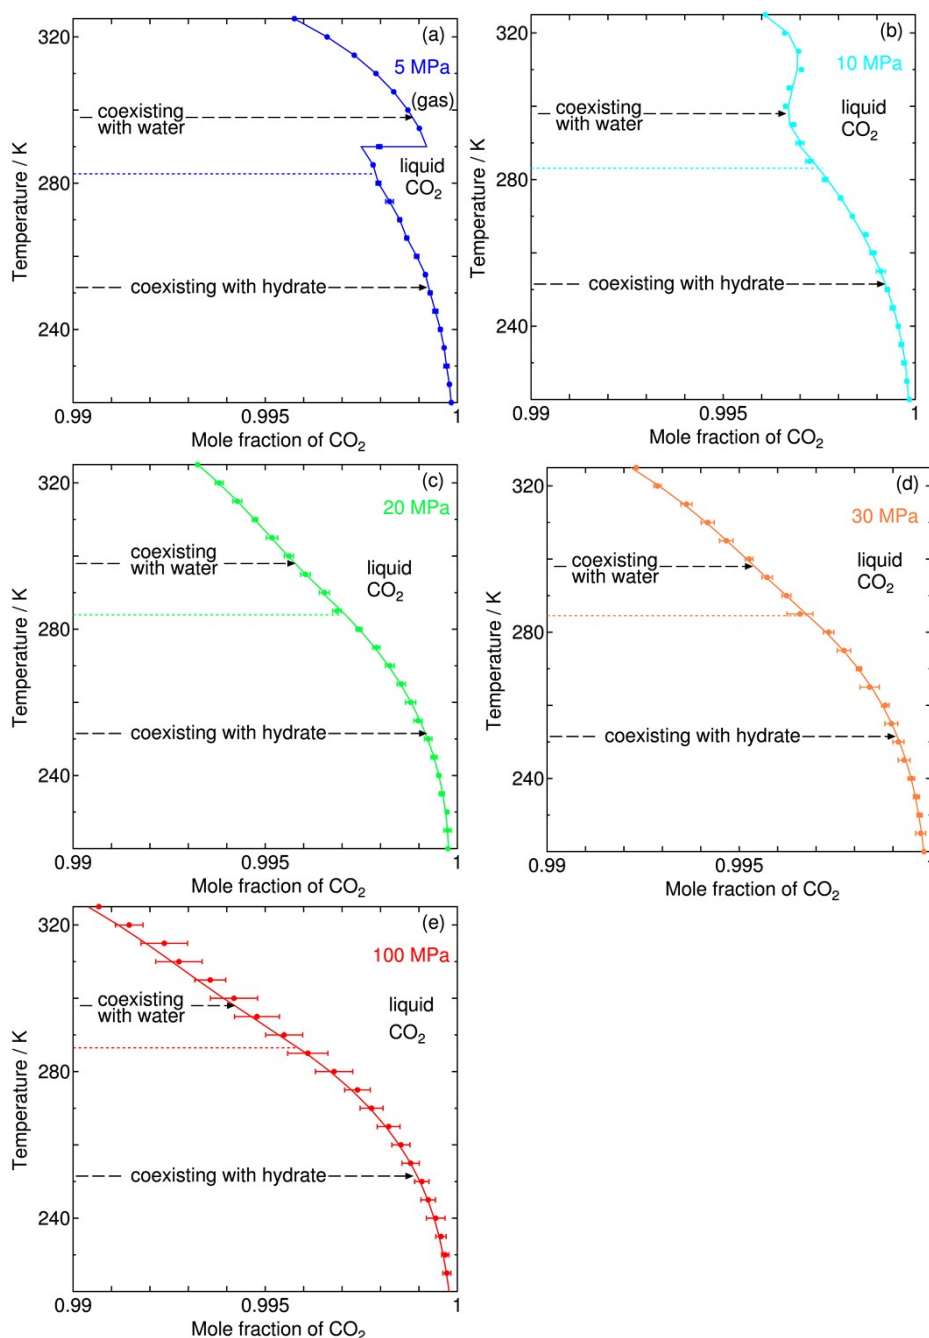

Fig. S2 Magnified phase diagram of the binary mixture of water and CO<sub>2</sub> for a region close to pure CO<sub>2</sub> at (a) 5, (b) 10, (c) 20, (d) 30, and (e) 100 MPa. The stable region of fluid CO<sub>2</sub> is separated by the solid curve. Liquid CO<sub>2</sub> coexists with either the aqueous solution or CO<sub>2</sub> hydrate in the left region of each solid curve. Each dotted line indicates the dissociation temperature above which no hydrate is stable and the CO<sub>2</sub> fluid is in equilibrium with the aqueous solution. The blue line in panel (a) depicts the interpolated solubility curve taking account of the breaks due to the vaporization of liquid CO<sub>2</sub>.
